# Supplementary material
Source: PubMed Central journal article supplement (PMC3538086)
Supplement: NIHMS384754-supplement-Online_Only.pdf [file NIHMS384754-supplement-Online_Only.pdf]

## 1 Online-Only Text

2 In post-hoc analyses, age was added as a covariate in the L amygdala ROI analysis and  
3 there remained a main effect of *Group*  $F(2,53)=3.78, p<.03$ , but no main effect of *Age*  $F(1,$   
4  $53)=1.84, p=.18$ . Similarly, we included *Age* as a covariate in the analysis of the one whole  
5 brain cluster for  $N \rightarrow A$  and the four clusters for  $N \rightarrow H$  that showed significant between-group  
6 differences. Again, all the main effects of *Group* remained significant (all  $F_s > 9$ , all  $p_s < .0001$ ),  
7 with no effects of *Age* (all  $F_s < 1.2$ , all  $p_s > .3$ ).

8 To investigate the effect of *Sex*, it was included as a between-groups variable in the  
9 amygdala ROI and whole-brain clusters. In the L amygdala ROI for  $N \rightarrow A$  there was a  
10 significant main effect of *Sex*,  $F(1,56)=6.83, p<.02$ , with males having a lower average beta  
11 weights (-.01) than females (.05). There was also a trend for a main effect of *Sex* in the L  
12 middle/superior frontal gyrus for  $N \rightarrow H$ ,  $F(1,56)=3.78, p=.06$ , with females having lower average  
13 beta weights (-.03) than males (.02). However, in neither the amygdala ROI nor any of the  
14 whole-brain clusters was there a significant *Group*  $\times$  *Sex* effect.

15 Possible group differences in pubertal status were evaluated by analyzing Tanner stage  
16 data. Unfortunately, Tanner stage data was available for some, but not all, of the participants (Ns  
17  $BD=18$ ,  $SMD=13$ ,  $HV=7$ ). Unfortunately, the majority of HV did not have Tanner Breast/Testes  
18 (TannerBT) or Tanner Pubic Hair (TannerPH) data. Using the available data, we assessed  
19 possible group differences for both TannerBT and TannerPH. There were no group differences  
20 on either measure (TannerBT:  $F(2,37)=2.28, p=.12$ ; TannerPH:  $F(2, 37)=2.11, p=.14$ ).

21  
22 Since BD and SMD differed significantly on CDRS score, CDRS score was used as a  
23 covariate in post-hoc analyses in the four whole brain  $N \rightarrow H$  clusters where these two patient  
24 groups differed from each other. (HV, by definition, were not depressed and CDRS ratings were  
25 not obtained, so they were not included in these analyses.) With CDRS scores covaried, BD and  
26 SMD still differed significantly from each other in all four clusters (all  $F_s > 10$ , all  $p_s < .0001$ ), and  
27 there was no effect of CDRS (all  $F_s < .05$ , all  $p_s > .8$ ).

28  
29 In regions where BD and SMD differed in their BOLD response patterns, an analysis of  
30 the effect of ADHD in BD was conducted in order to aid in the interpretation of the  $N \rightarrow H$   
31 results. For the L Amygdala ROI, an ANOVA was conducted including only BD subjects, with  
32 the between-groups factor being with or without ADHD. There were 10 BD with ADHD and 9  
33 BD without ADHD. There was no difference in the  $N \rightarrow A$  slope for BD with vs. without ADHD,  
34  $F(1,17)=.26, p=.62$ . A similar ANOVA was also conducted on the one whole brain cluster  
35 identified in the whole-brain analysis for  $N \rightarrow A$  (i.e., in the posterior cingulate). Again, we found  
36 no difference in BD with vs. without ADHD,  $F(1,17)=.83, p=.34$ . The four whole brain clusters  
37 that were significant for  $N \rightarrow H$  also showed no ADHD effects, all  $F_s < .3, p_s > .38$ .

38  
39 An additional analysis examined correlations between behavioral and neural measures in  
40 the amygdala ROI and in the clusters from the whole-brain analysis that showed significant  
41 between-group differences. Specifically, we examined correlations between the slope of the  
42 behavioral ratings (i.e., hostile and nose ratings) and the slope of the beta weights in each of  
43 these rating conditions. The only significant finding was in the amygdala for the BD youth,

44 where there was a positive correlation between the slope of neural activation during nose width  
45 ratings of angry faces and the slope of the nose width ratings themselves ( $r=.53$ ,  $p=.02$ ). Of note,  
46 this finding would not remain significant after correction for multiple comparisons. All other  
47 correlations between neural activation and behavioral ratings (hostile ratings of angry faces,  
48 hostile ratings of happy faces, nose width ratings of angry faces, nose width ratings of happy  
49 faces) were not significant.

50  
51 Since the samples of medicated vs. unmedicated patients are very small and thus prone to  
52 Type II error, we covaried medication status (on/off medication) within BD vs. SMD (since HV  
53 were not medicated) in the four whole brain N→H clusters where the two patient groups differed  
54 from each other. With medication status scores covaried, BD and SMD still differed significantly  
55 in all four clusters (all  $F_s > 13$ , all  $p_s < .001$ ), and there was no effect of medication status (all  
56  $F_s < 1.5$ , all  $p_s > .2$ ).

57  
58 A *Group x Attention* ANOVA for N→A in the whole-brain cluster of the posterior  
59 cingulate, conducted in euthymic patients only, showed a main effect of *Group*, driven by BD vs.  
60 HV ( $p < .005$ ), with a trend for SMD vs. HV ( $p = .06$ ). For N→H in the R inferior parietal lobule  
61 (BA40/7), SMD continued to differ from both BD and HV. In the L Middle Occipital/Fusiform  
62 Gyrus (BA37) the main effect of group remained, while the post-hoc analyses were not  
63 significant. In the R Middle Occipital Gyrus/Cuneus (BA18/19) and the L Middle/Superior  
64 Frontal Gyrus (BA6/8) the results of the main effect of *Group* and post-hoc analyses were  
65 unchanged from the primary analysis.

66
